# Supplementary material for: The Role of Cosolvent–Water Interactions in Effects of the Media on Functionality of Enzymes: A Case Study of Photobacterium leiognathi Luciferase
Source: MDPI journal article supplement (doi:10.3390/life13061384), 2023-06-13
Supplement: s1 [file s1]

# **The role of cosolvent–water interactions in effects of the media on functionality of enzymes: a case study of *Photobacterium leiognathi* luciferase**

Albert E. Lisitsa <sup>1</sup>, Lev A. Sukovatyi <sup>1</sup>, Anna A. Deeva <sup>1</sup>, Dmitry V. Gulnov <sup>1</sup>, Elena N. Esimbekova <sup>1,2</sup>, Valentina A. Kratasyuk <sup>1,2</sup>, and Elena V. Nemtseva <sup>1,2</sup>

<sup>1</sup>Siberian Federal University, 660041, Svobodny 79, Krasnoyarsk, Russia

<sup>2</sup>Institute of Biophysics SB RAS, 660036, Akademgorodok 50/50, Krasnoyarsk, Russia

## **Supplementary Material**

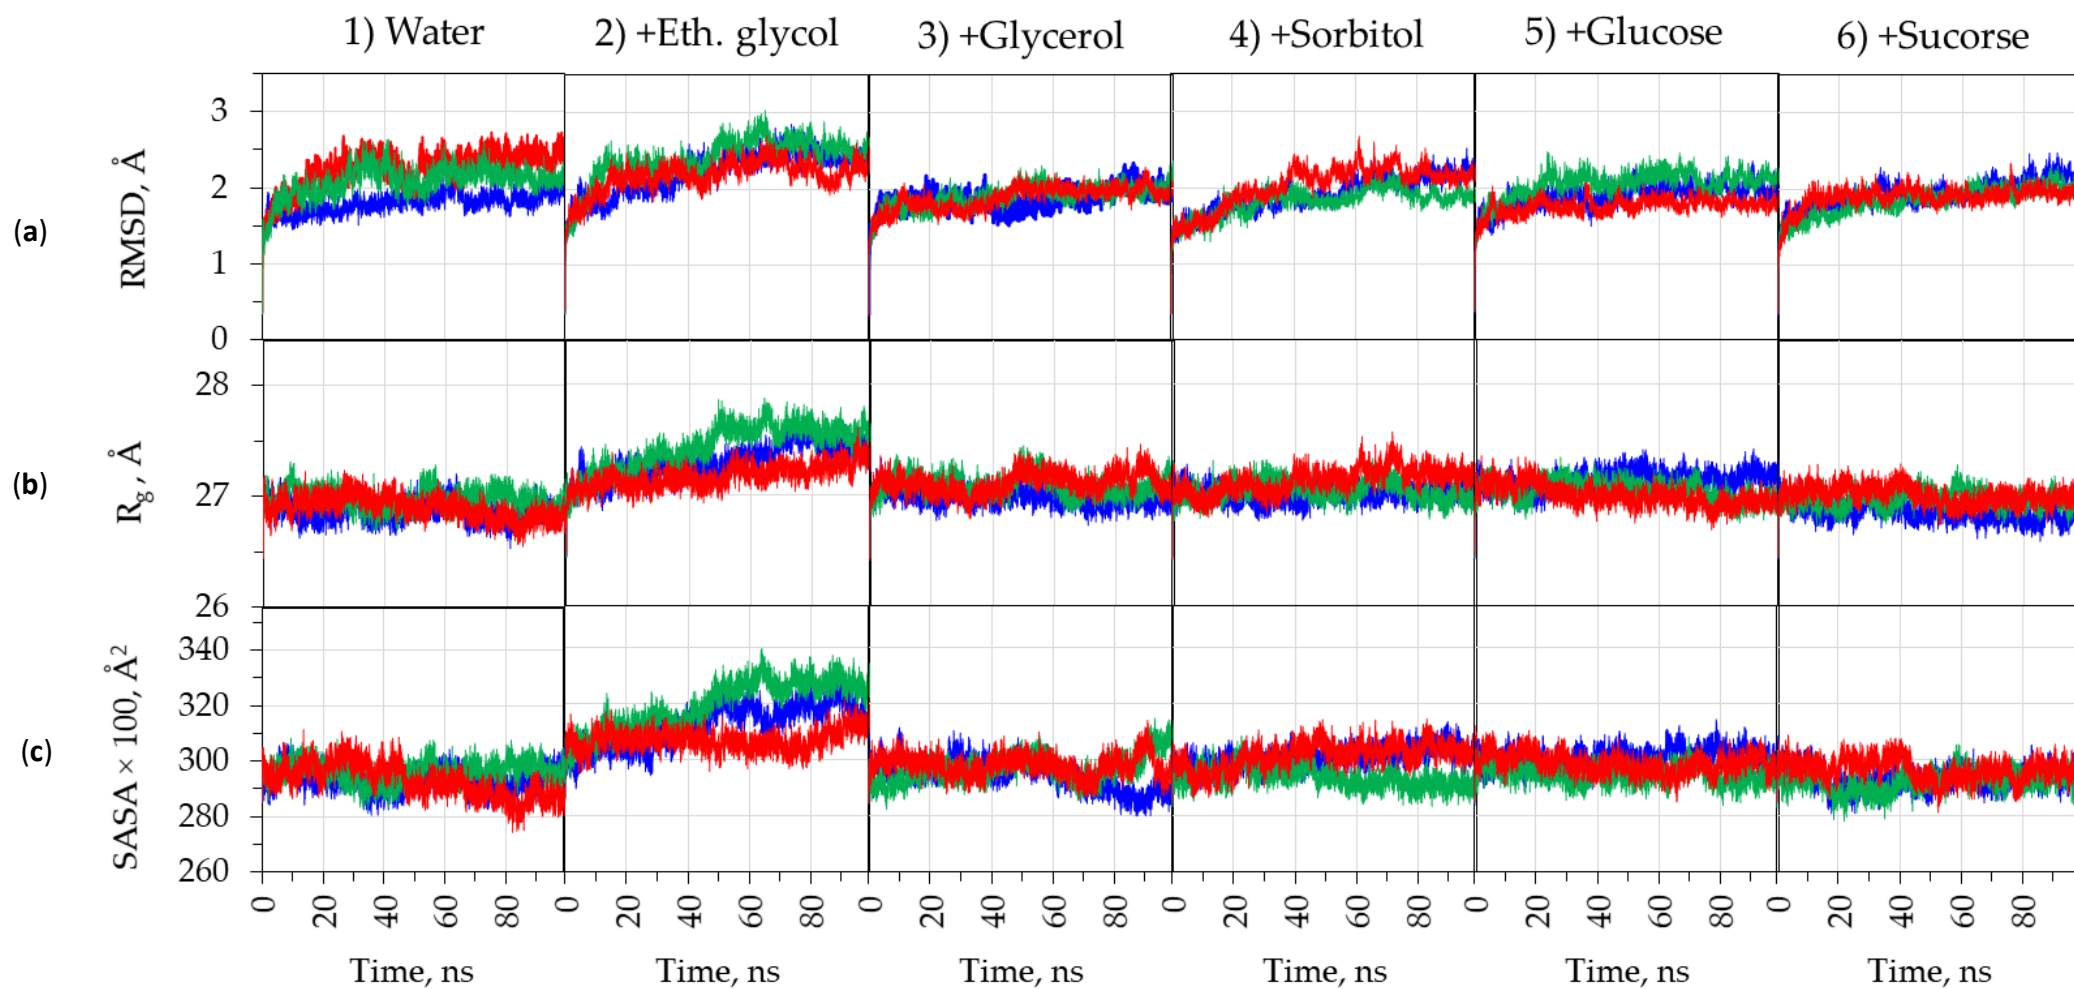

Figure S1. The structural parameters change of *P. leiognathi* luciferase obtained during 100-ns MD simulation using the models with water and the mixtures with 1) ethylene glycol (30 wt %), 2) glycerol (40 wt %), 3) sorbitol (40 wt %), 4) glucose (40 wt %), and 5) sucrose (40 wt %): (a) the root-mean-square-deviation of  $C_{\alpha}$ -atoms (RMSD); (b) the gyration radius for all protein atoms ( $R_g$ ); (c) the total solvent accessible surface area (SASA). Three independent runs are shown by blue, green and red curves.
